# Supplementary material for: Klotho deficiency intensifies hypoxia-induced expression of IFN-α/β through upregulation of RIG-I in kidneys
Source: PubMed Central journal article supplement (PMC8530307; doi:10.1371/journal.pone.0258856), 2021-10-21
Supplement: pone.0258856.s001.pdf [file pone.0258856.s001.pdf]

## Supporting Information

# **Klotho deficiency intensifies hypoxia-induced expression of IFN- $\alpha/\beta$ through upregulation of RIG-I in kidneys**

Asako Urabe<sup>1</sup>, Shigehiro Doi<sup>1\*</sup>, Ayumu Nakashima<sup>1,2</sup>, Takeshi Ike<sup>1</sup>, Kenichi Morii<sup>1</sup>, Kensuke Sasaki<sup>1</sup>, Toshiki Doi<sup>1</sup>, Koji Arihiro<sup>3</sup>, Takao Masaki<sup>1\*</sup>

<sup>1</sup>Department of Nephrology, Hiroshima University Hospital, Hiroshima, Japan;

<sup>2</sup>Department of Stem Cell Biology and Medicine, Graduate School of Biomedical & Health Sciences, Hiroshima University, Hiroshima, Japan; <sup>3</sup>Department of Anatomical Pathology, Hiroshima University Hospital, Hiroshima, Japan

S1 Fig.

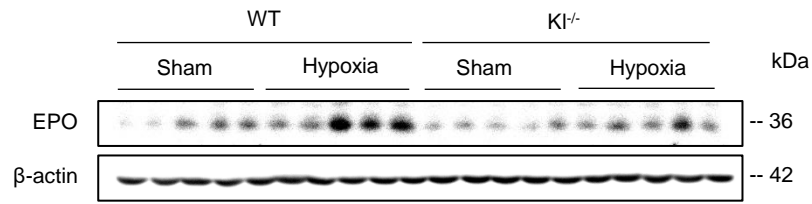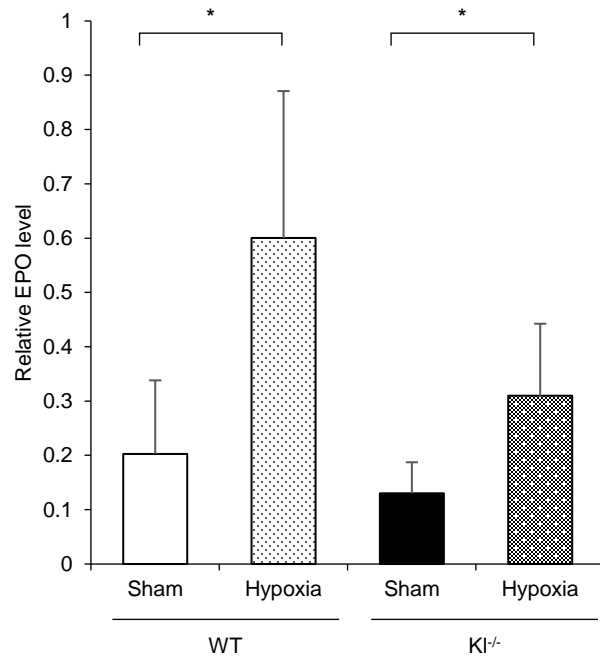

**S1 Fig. Erythropoietin expression is intensified under hypoxic conditions in WT and  $KI^{-/-}$  mice**

Western blot analysis demonstrating erythropoietin (EPO) (66975-1-Ig; proteintech, Rosemont, IL, USA) expression in WT and  $KI^{-/-}$  mice. Protein levels were normalized to  $\beta$ -actin levels (n=5 in each group). Values are mean  $\pm$  SD. \* $P < 0.05$ , \*\* $P < 0.01$ .
