# Supplementary material for: Klotho deficiency intensifies hypoxia-induced expression of IFN-α/β through upregulation of RIG-I in kidneys
Source: PubMed Central journal article supplement (PMC8530307; doi:10.1371/journal.pone.0258856), 2021-10-21
Supplement: pone.0258856.s002.pdf [file pone.0258856.s002.pdf]

S2 Fig.

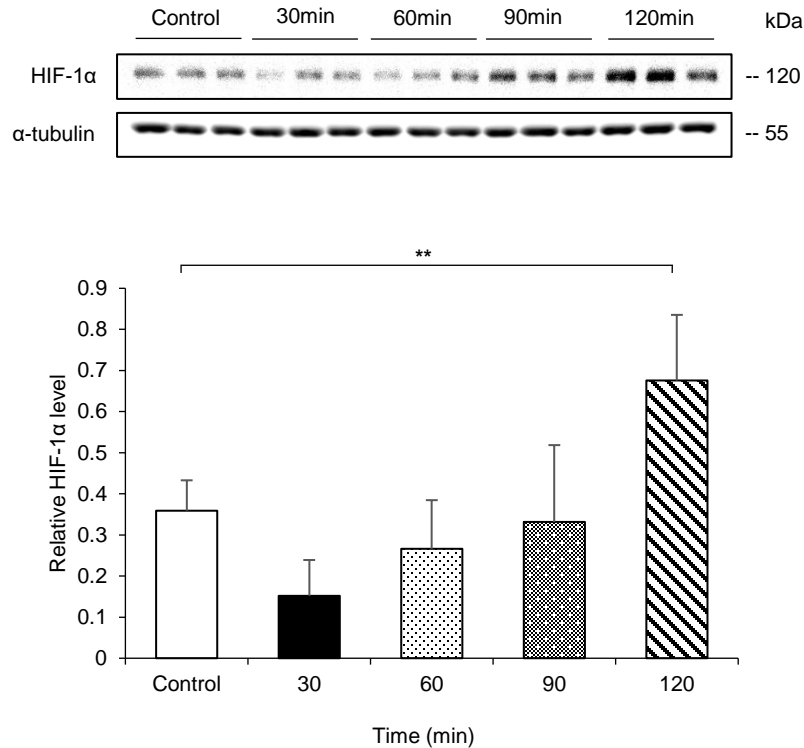

### S2 Fig. Hypoxia enhances expression of HIF-1α in a rat cell line of epithelial cells of renal tubules

NRK-52E cells were incubated under hypoxic conditions (1.0% O<sub>2</sub>) for 30, 60, 90, and 120 min. Cell lysates were subjected to western blot analysis using antibodies against HIF (Hypoxia Inducible Factor)-1α (#36169S; Cell Signaling Technology, Danvers, MA, USA). Typical western blot analysis demonstrated the expression levels of HIF-1α. Graphs show the expression levels quantified by densitometry and normalized to α-tubulin (n=5 in each group). Values are expressed as the mean ± SD. Statistical analysis was performed using ANOVA followed by Tukey's post hoc test. \**P* < 0.05, \*\**P* < 0.01.
