# Supplementary material for: Klotho deficiency intensifies hypoxia-induced expression of IFN-α/β through upregulation of RIG-I in kidneys
Source: PubMed Central journal article supplement (PMC8530307; doi:10.1371/journal.pone.0258856), 2021-10-21

S6 Fig. raw images of western blots for Fig 1C.

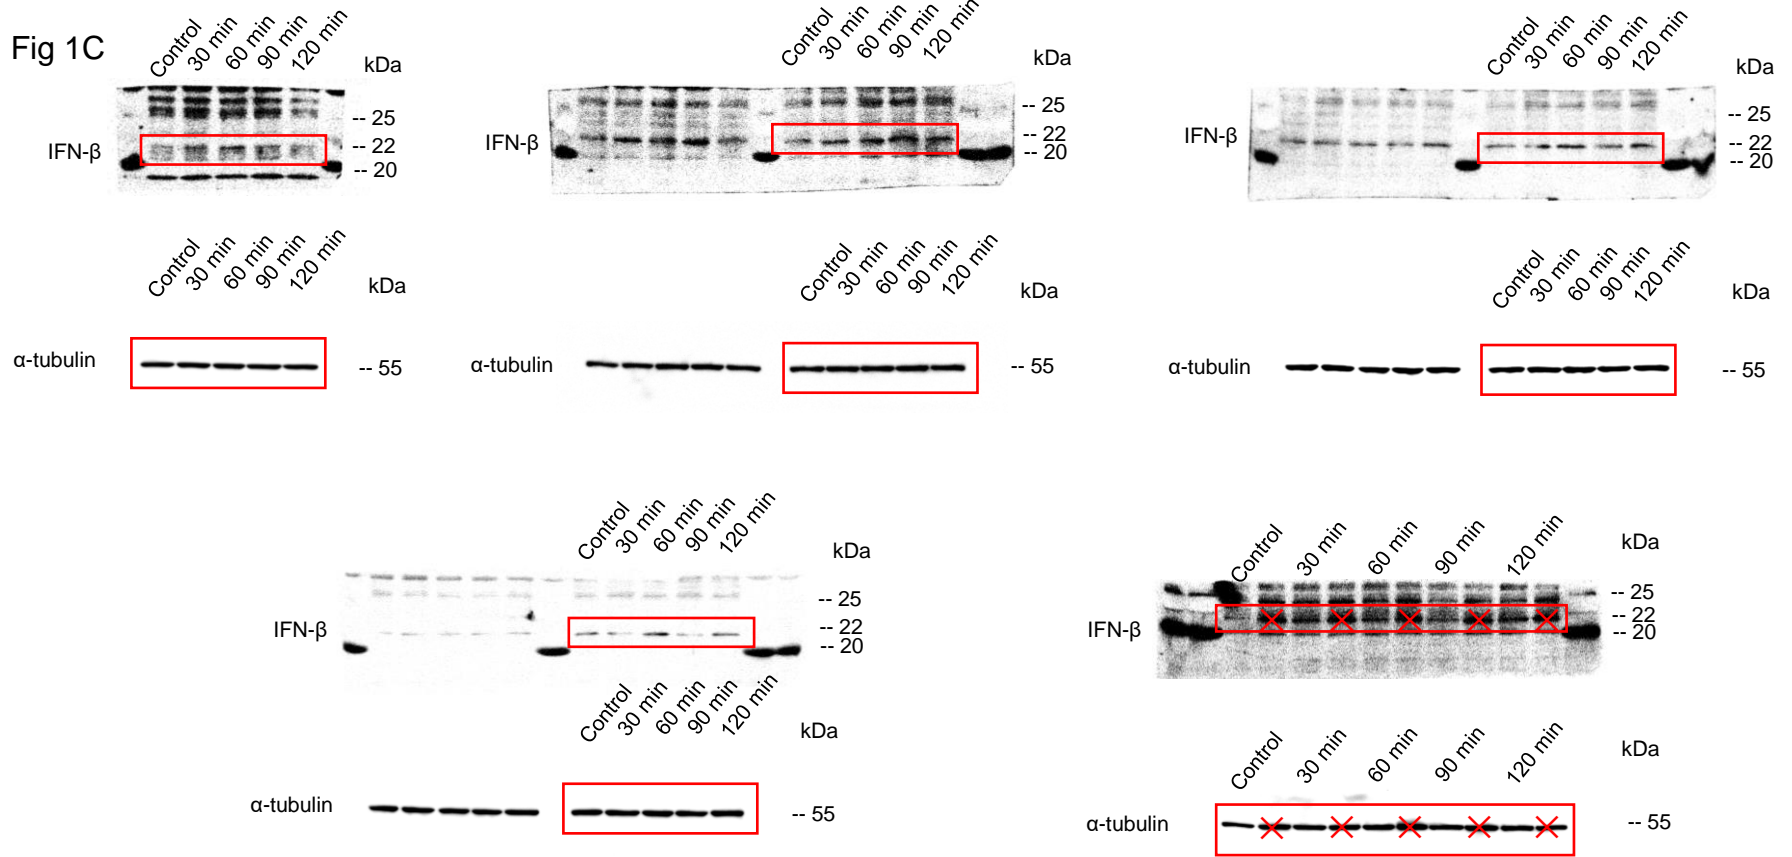

Supplement: pone.0258856.s005.pdf [file pone.0258856.s005.pdf]
