# Supplementary material for: Klotho deficiency intensifies hypoxia-induced expression of IFN-α/β through upregulation of RIG-I in kidneys
Source: PubMed Central journal article supplement (PMC8530307; doi:10.1371/journal.pone.0258856), 2021-10-21

S7 Fig. raw images of western blots for Fig 2A, 2B, and 2C.

Fig 2A

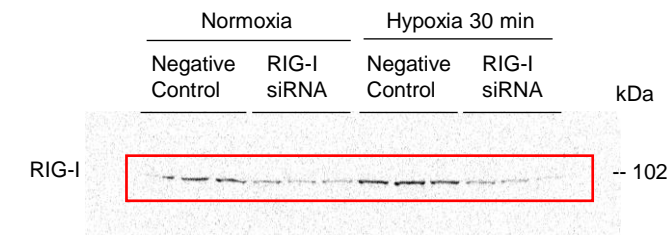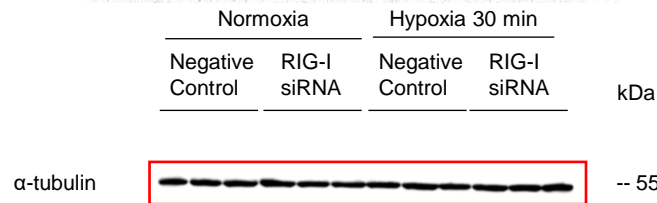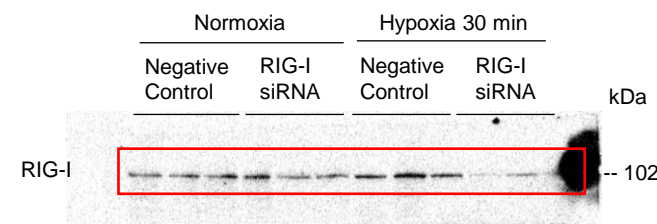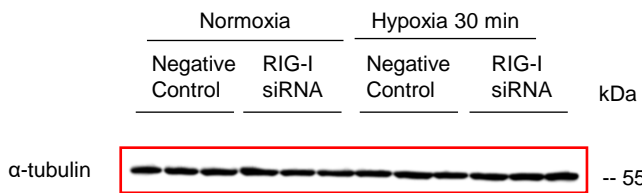

Fig 2B

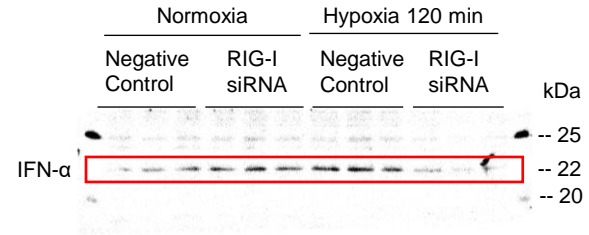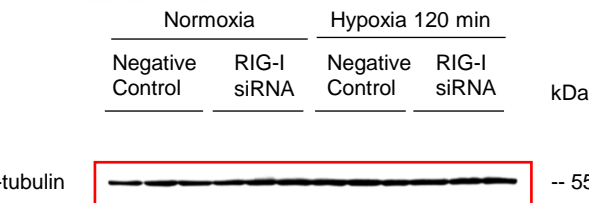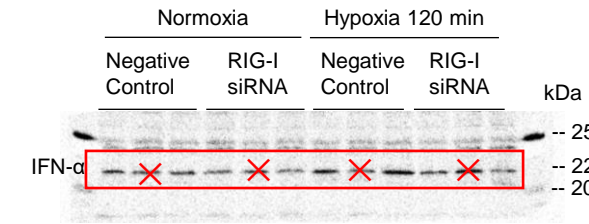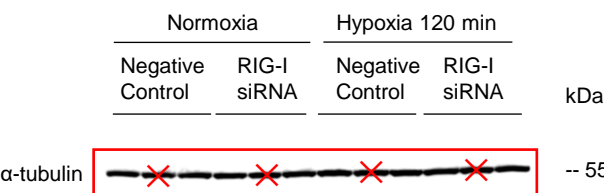

Fig 2C

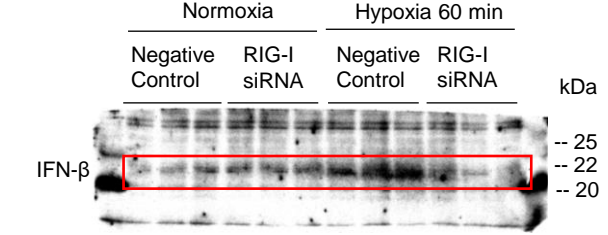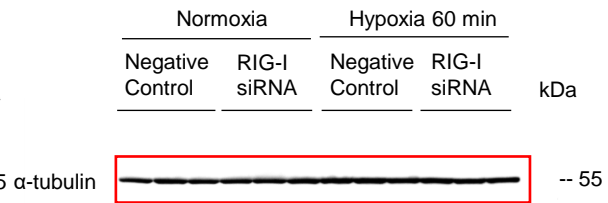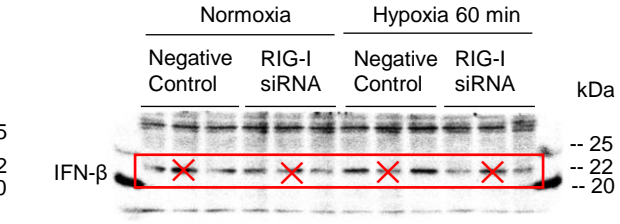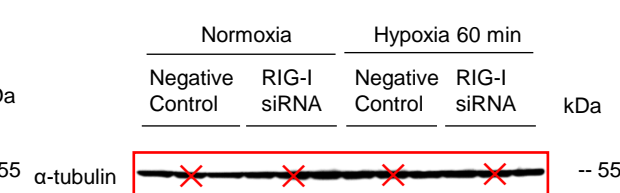

Supplement: pone.0258856.s006.pdf [file pone.0258856.s006.pdf]
