# Supplementary material for: Klotho deficiency intensifies hypoxia-induced expression of IFN-α/β through upregulation of RIG-I in kidneys
Source: PubMed Central journal article supplement (PMC8530307; doi:10.1371/journal.pone.0258856), 2021-10-21

S8 Fig. raw images of western blots for Fig 4A, 5A, 6A, and 7A.

Fig 4A

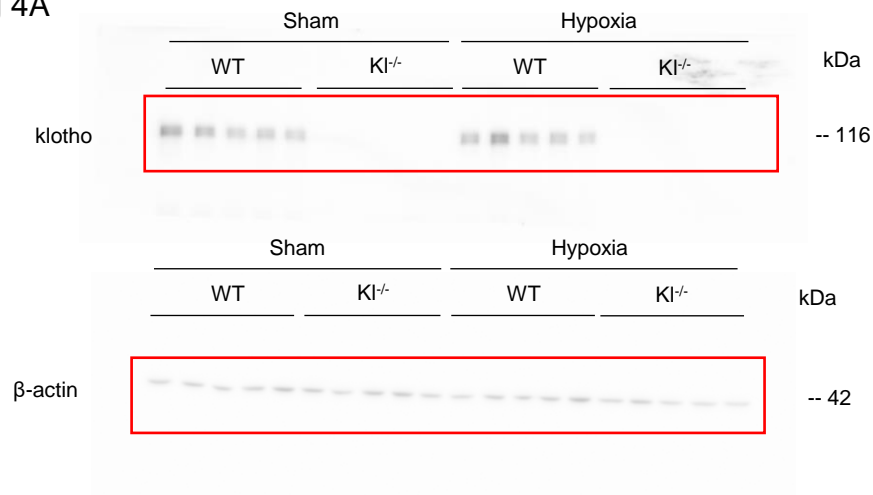

Fig 5A

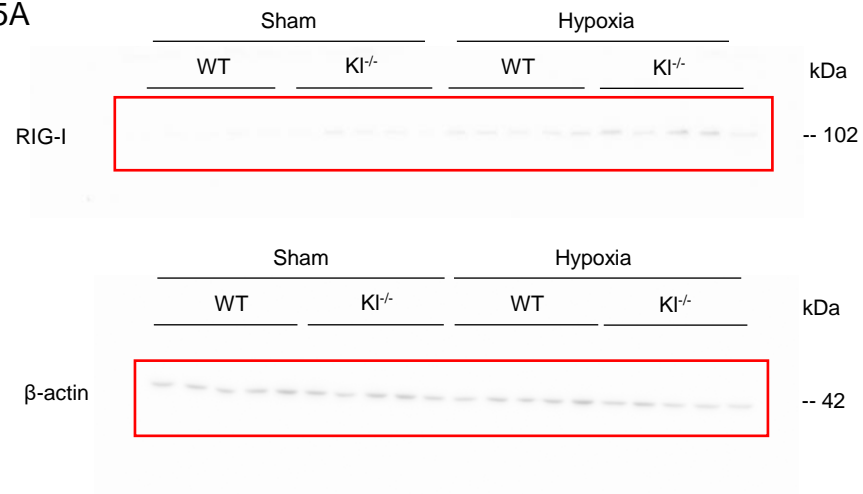

Fig 6A

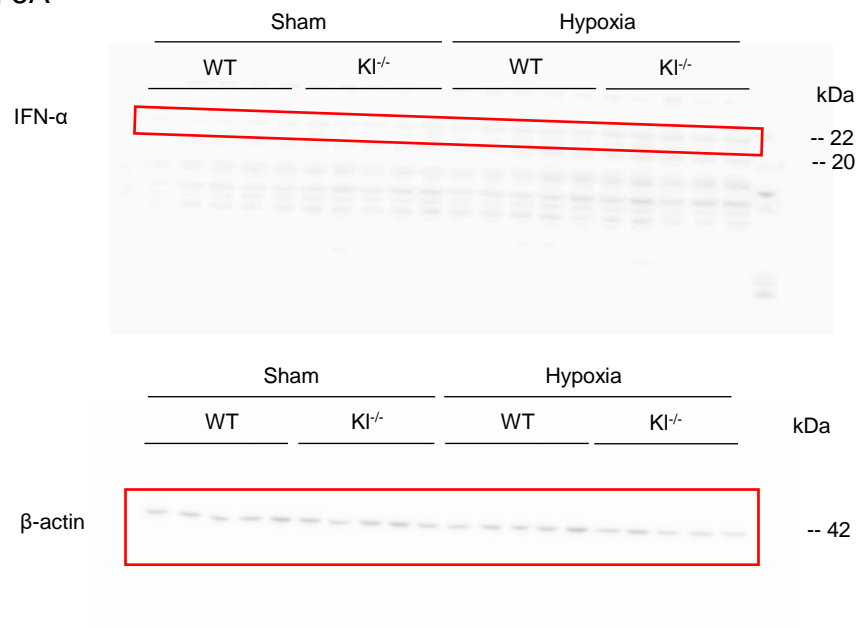

Fig 7A

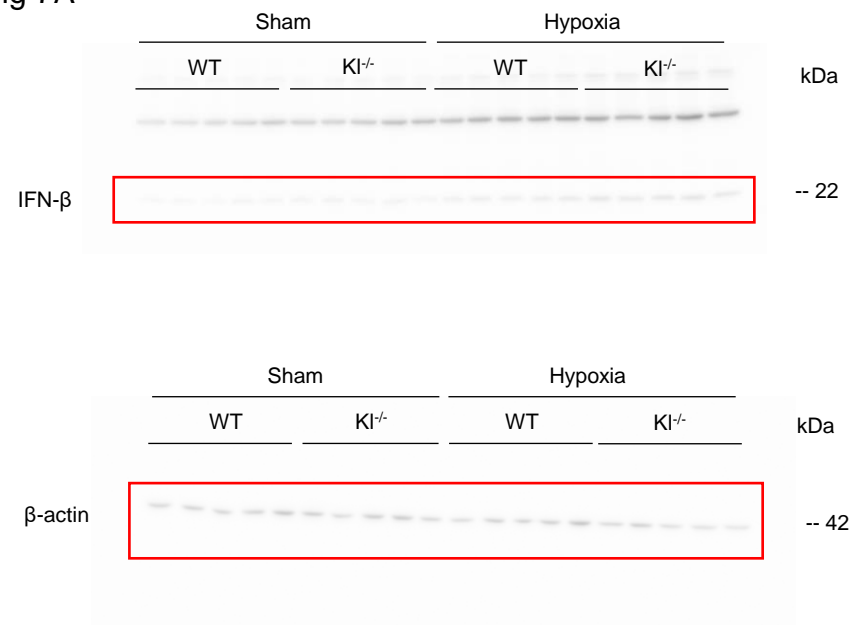

Supplement: pone.0258856.s007.pdf [file pone.0258856.s007.pdf]
