# Supplementary material for: Klotho deficiency intensifies hypoxia-induced expression of IFN-α/β through upregulation of RIG-I in kidneys
Source: PubMed Central journal article supplement (PMC8530307; doi:10.1371/journal.pone.0258856), 2021-10-21

S9 Fig. raw images of western blots for S1 Fig and S2 Fig.

S1 Fig.

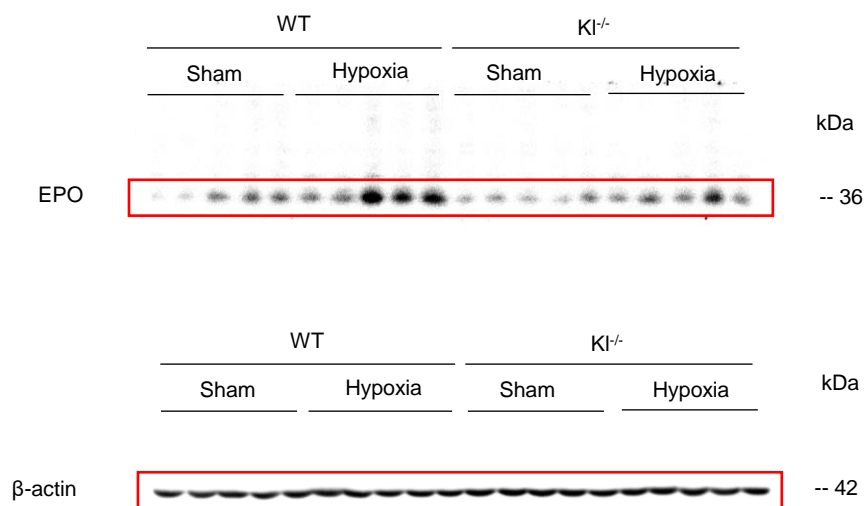

S2 Fig.

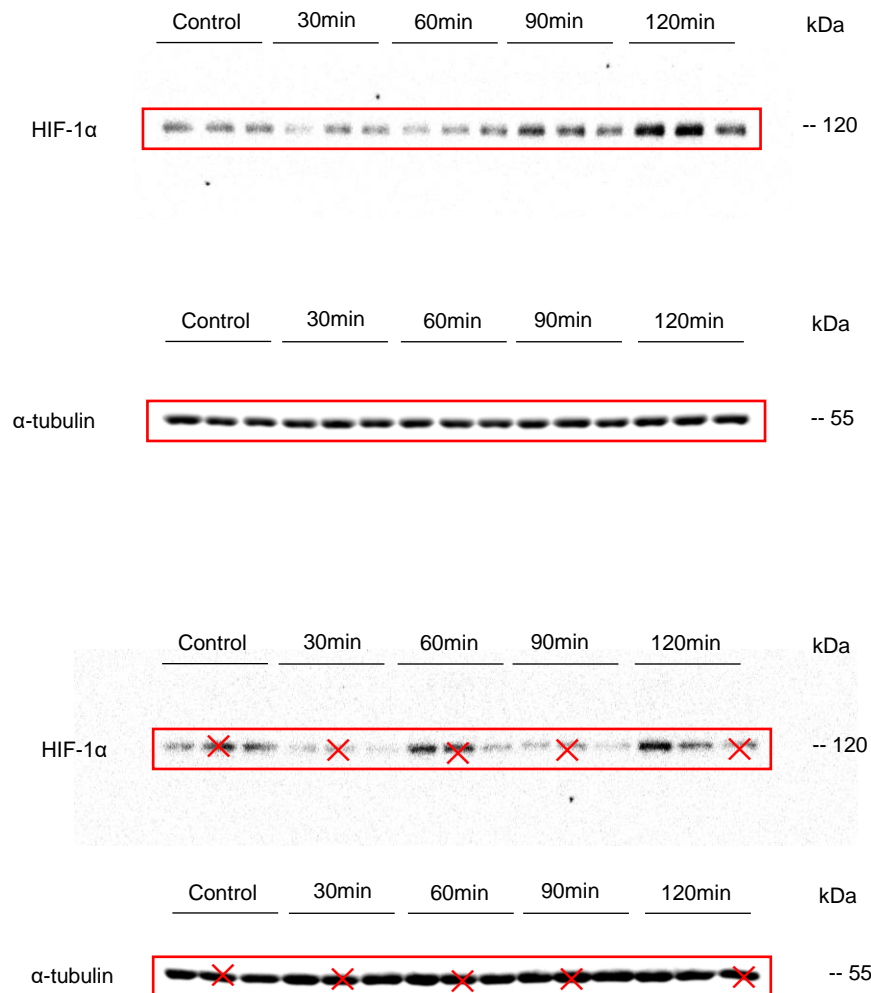

Supplement: pone.0258856.s008.pdf [file pone.0258856.s008.pdf]
