# Supplementary material for: Klotho deficiency intensifies hypoxia-induced expression of IFN-α/β through upregulation of RIG-I in kidneys
Source: PubMed Central journal article supplement (PMC8530307; doi:10.1371/journal.pone.0258856), 2021-10-21
Supplement: pone.0258856.s009.pdf [file pone.0258856.s009.pdf]

S3 Table. Clinical characteristics related to renal function of IgA nephropathy patients

| Variables                               | Total ( n = 33 )    |
|-----------------------------------------|---------------------|
| Age                                     | 45.9 ± 11.6         |
| Male sex                                | 51.5%               |
| Body mass index                         | 24.2 ± 4.2          |
| Renin-angiotensin system inhibitor      | 24.2%               |
| Systolic blood pressure (mmHg)          | 127.5 ± 14.7        |
| Diastolic blood pressure (mmHg)         | 77.8 ± 9.8          |
| Total urinary protein (g/day)           | 1.08 ± 1.62         |
| Cr (mg/dL)                              | 1.11 ± 0.78         |
| eGFR (mL/min/1.73 m <sup>2</sup> )      | 62.7 ± 21.1         |
| Creatinine clearance (mL/min)           | 89.9 ± 31.7         |
| Total cholesterol (mg/dL)               | 209 ± 52.2          |
| Triglyceride (mg/dL)                    | 157 ± 111           |
| LDL cholesterol (mg/dL)                 | 123 ± 36.7          |
| HDL cholesterol (mg/dL)                 | 60.1 ± 15.8         |
| Diabetes mellitus                       | 6.2%                |
| Hypertension                            | 15.2%               |
| Dyslipidemia                            | 6.1%                |
| Hyperuricemia                           | 6.1%                |
| The Oxford classification               |                     |
| Mesangial hypercellularity              | M1 : 24.2%          |
| Segmental glomerulosclerosis            | S1 : 45.5%          |
| Endocapillary hypercellularity          | E1 : 6.1%           |
| Tubular atrophy / interstitial fibrosis | T1 : 18.2%, T2 : 0% |

**Abbreviations**

eGFR : estimated glomerular filtration rate

The Japanese GFR equation based on serum creatinine (Cr) was used for eGFR.

$$eGFR \text{ (mL/min/1.73 m}^2\text{)} = 194 \times Cr^{-1.094} \times Age^{-0.287} (\times 0.739 \text{ if female})$$

Cr : Creatinine

LDL : low-density lipoprotein, HDL : high-density lipoprotein
